# Supplementary material for: Bioderivatization as a concept for renewable production of chemicals that are toxic or poorly soluble in the liquid phase
Source: PubMed Central journal article supplement — Proc Natl Acad Sci U S A. 2020 Jan 8;117(3):1404–13. doi: 10.1073/pnas.1914069117 (PMC6983404; doi:10.1073/pnas.1914069117), 2020-01-08
Supplement: pnas.1914069117.sapp.pdf [file pnas.1914069117.sapp.pdf]

Supplementary information for

**Bioderivatization as a concept for renewable production of chemicals that are toxic or poorly soluble in the liquid phase**

Pachara Sattayawat, Ian Sofian Yunus, and Patrik R. Jones

Patrik R. Jones

Email: [p.jones@imperial.ac.uk](mailto:p.jones@imperial.ac.uk)

**This PDF file includes:**

Materials and Methods

Figures S1 to S18

Tables S1 to S12

SI references

## SI Materials and Methods

### Construction of *E. coli* strains for 1-octanol and octyl acetate production

To obtain Strain No. 3 to 5 in Table S1, *E. coli* strain C43 (DE3) was transformed with plasmid pET-TPC3 harboring *tes3*, *sfp*, and *car* genes. Plasmid pACYC-petF-fpr plasmid was used as a template to amplify the *cat* gene. The strawberry alcohol acetyltransferase gene (*saat*) from *Fragaria x ananassa* (UniProtKB: Q9FVF1) and the alcohol O-acetyltransferase gene (*atf1*) from *Saccharomyces cerevisiae* (UniProtKB: P40353) were chemically synthesized from Integrated DNA Technologies (IDT) and codon optimized for *E. coli*. The *saat* and *atf1* genes were individually stored in a blunt-ended pJET1.2 plasmid (Thermo Fisher Scientific), resulting in pJET-SAAT and pJET-ATF1 plasmids, respectively. Next, pCDF-GFP plasmid harboring T7 promoter was constructed as described in Table S7. The *cat*, *saat*, and *atf1* genes were then sub-cloned into pCDF-GFP plasmid using *BsaI* restriction site which was introduced by PCR using the oligonucleotide primers listed in Table S4. The resulting plasmid was transformed into the *E. coli* C43 (DE3) strain carrying the pET-TPC3 plasmid, generating Strain No. 3 to 5 in Table S1.

Next, BASIC method was used to construct plasmids in Strain No. 7 to 15 in Table S1. First, plasmid pET-PA1lacO-1-GFP and pCDF-PA1lacO-1-GFP harboring PA1lacO-1 promoter were constructed as shown in Table S6 No. 1 and 2, respectively. Next, the *tes3* and *sfp-car* genes were amplified from plasmid pET-TPC3 using primers listed in Table S4 and cloned into a blunt-ended plasmid pJET1.2 (Thermo Fisher Scientific). Other genes encoding thioesterases: '*CpFatB1*', '*CaFatB3*', '*CpFatB1-4*', and '*CaFatB3-5*' genes were chemically synthesized as gBlocks from Integrated DNA Technologies (IDT) and cloned into pJET1.2 blunt. The resulting plasmids were used to create plasmids used in Strain No. 7 to 15 in Table S1. The linkers and plasmids used for BASIC method are listed in Table S6 No. 3 to 9. The amino acid sequence of '*CpFatB1*', '*CaFatB3*', '*CpFatB1-4*', and '*CaFatB3-5*' and their wild types are shown in Fig. S1.

### Construction of *E. coli* strains for octyl glucoside production

To obtain Strain No. 16-22 in Table S1, *E. coli* strain BW25113 was transformed with pET-'*CaFatB3-5-Sfp-CAR*'. The glycosyltransferase (GT) from *Actinidia deliciosa* (*AdGT4*), *Vitis vinifera* (*VvGT1*), *Medicago truncatula* (*MtGT1*), *Arabidopsis thaliana* (*AtGT1*) and *Medicago truncatula* (*MtH2*) and the gene encoding sucrose synthase from *Arabidopsis thaliana* (*AtSUS1*) were chemically synthesized as gBlocks from Integrated DNA Technologies (IDT) and codon-optimized for *E. coli*. The UniProtKB ID for all the genes used in this study is listed in Table S3. All gBlocks were cloned into blunt-ended pJET1.2 plasmid (Thermo Fisher Scientific). The resulting plasmids are listed in Table S8 and used for Biopart Assembly Standard for Idempotent Cloning (BASIC) method in Table S6. All the linkers (Table S5) and plasmids used to create CloDF13-based plasmids harboring the glycosyltransferase and sucrose synthase under the PA1lacO1 promoter are provided in Table S6. The resulting plasmid was then transformed into *E. coli* BW25113 strain carrying pET-'*CaFatB3-5-Sfp-CAR*' plasmid.

## Construction of cyanobacterial strains for 1-octanol and octyl acetate production

To create strain 6803- $\Delta$ aas-PnrsB-Sfp-CAR, a suicide plasmid targeting *phaA* and *phaB* sites (encoded by *slr1993* and *slr1994*) was first constructed. All the genetic parts used for this plasmid construction are listed in Table S9. Next, the plasmids carrying the upstream (pLY453) and downstream (pLY454) genetic parts were assembled using the linkers shown in Table S10. Next, the suicide plasmid (pLY475) carrying a *gfp* dropout gene were created as shown in Table S11. Next, the *sfp* and *car* genes were then amplified using primers listed in Table S9 and sub-cloned into pJET1.2 blunt plasmid to give plasmid pLY485. Finally, the *sfp* and *car* genes were cloned into plasmid pLY475 using the linkers shown in Table S12. The expression of Sfp and CAR were under controlled of a nickel-inducible promoter PnrsB. Plasmid pLY706 (pMB1-Amp-*phaA*<sub>up</sub>-PnrsB-Sfp-CAR-termB15-Sp-*phaB*<sub>down</sub>) was then naturally transformed into 6803- $\Delta$ aas strain. In brief, 6803- $\Delta$ aas strain was inoculated in 25 ml of BG11-Co liquid medium at 30°C with continuous illumination at 60  $\mu$ mol photons/m<sup>2</sup>.s and 1% (v/v) CO<sub>2</sub> in the Algaetron AG 230 (Photon Systems Instruments). When the OD<sub>730</sub> reached 0.3-0.4, the cells were harvested and resuspended in 500  $\mu$ L fresh BG11-Co medium. One hundred microliters of concentrated liquid culture were mixed with four to seven micrograms of plasmid pLY706 and incubated at 60  $\mu$ mol photons/m<sup>2</sup>.s and 1% (v/v) CO<sub>2</sub> for 12-16 h prior to plating on BG11-Co agar containing 20  $\mu$ g/ml spectinomycin. The plate was then incubated at 30°C with continuous illumination at 60  $\mu$ mol photons/m<sup>2</sup>.s for 1-2 weeks or until the colonies appeared. To promote segregations, individual colonies were restreaked on BG11-Co containing 50  $\mu$ g/ml spectinomycin and 100  $\mu$ g/ml spectinomycin. A fully segregated mutant was confirmed by PCR using primers IY293 (5'-GGCAAAGCTTTATTTGCCAATGCG-3') and IY292 (5'-CCGATGACACTAATCTCAAGGCGG-3') and used in the subsequent experiments.

Next, to obtain strain 6803- $\Delta$ aas-PnrsB-Sfp-CAR-Pcoa-'CpFatB1-4 and 6803- $\Delta$ aas-PnrsB-Sfp-CAR-Pcoa-'CpFatB1-4-SAAT, plasmid pLY849 (Table S6 No. 10, pRSF1010-Ery-Pcoa-'CpFatB1-4) and pLY887 (Table S6 No. 11, pRSF1010-Ery-Pcoa-'CpFatB1-4-SAAT) were individually transformed into 6803- $\Delta$ aas-PnrsB-Sfp-CAR strain by triparental conjugation. In brief, plasmid pLY849 and pLY887 was first transformed individually into *E. coli* cargo HB101 strain carrying pRL623 plasmid (1). Next, one hundred microliters of the cargo strain carrying both pRL623 and pLY849 or pLY887, conjugal strain carrying plasmid pRL443 (1) and the 6803- $\Delta$ aas-PnrsB-Sfp-CAR strain were mixed and incubated for 2 h (30°C, 60  $\mu$ mol photons/m<sup>2</sup>.s). Prior to mixing, all strains were washed with LB medium (for *E. coli*) or BG11-Co medium (for cyanobacteria) to remove all the antibiotics. After 2 h of incubation, the mixed culture was then plated on BG11-Co agar plates without antibiotic and incubated for two days (30°C, 60  $\mu$ mol photons/m<sup>2</sup>.s). After 2 days of incubation, biomass was scraped from the agar plates and transferred onto a new agar plate containing 20  $\mu$ g/ml erythromycin. Individual colonies were restreaked onto a new agar plate containing 20  $\mu$ g/ml erythromycin, 10  $\mu$ g/ml spectinomycin, and 10  $\mu$ g/ml kanamycin and incubated in the Algaetron AG 230 for 4-7 days before it was used for subsequent experiments. Empty plasmid pLY606 was also used as control to obtain strain 6803- $\Delta$ aas-PnrsB-Sfp-CAR-Pcoa-empty.

All plasmids used in this study are listed in Table S8.

### **Preparation of BG11-Co liquid medium**

The standard 1X BG11-Co liquid medium was prepared by mixing 10 ml 100X BG11-Co, 1 ml 1000X ferric ammonium citrate, 1 ml 1000X Na<sub>2</sub>CO<sub>3</sub>, and 1 ml 1000X K<sub>2</sub>HPO<sub>4</sub> in 1 L of ultrapure water (PURELAB flex 2). The concentrated BG11-Co stock solution (100X BG11-Co) containing 149.6 g NaNO<sub>3</sub>, 7.49 g MgSO<sub>4</sub>·7H<sub>2</sub>O, 3.6 g CaCl<sub>2</sub>·2H<sub>2</sub>O, 0.89 g Na-citrate·2H<sub>2</sub>O, 1.12 ml 0.25 M NaEDTA pH 8.0, and 100 ml 1000X trace mineral solution in 1 L ultrapure water was prepared. The 1000X trace mineral solution was made by dissolving 2.86 g H<sub>3</sub>BO<sub>3</sub>, 1.81 g MnCl<sub>2</sub>·4H<sub>2</sub>O, 0.22 g ZnSO<sub>4</sub>·7H<sub>2</sub>O, 0.39 g Na<sub>2</sub>MoO<sub>4</sub>·2H<sub>2</sub>O, and 0.079 g CuSO<sub>4</sub>·5H<sub>2</sub>O in 1 L ultrapure water and stored at 4°C until being used. The 1000X ferric ammonium citrate, 1000X Na<sub>2</sub>CO<sub>3</sub>, and 1000X K<sub>2</sub>HPO<sub>4</sub> solutions were prepared by dissolving 0.6 g ferric ammonium citrate, 2 g Na<sub>2</sub>CO<sub>3</sub>, and 3.05 g K<sub>2</sub>HPO<sub>4</sub> in 100 ml ultrapure water, respectively. The 1 L standard 1X BG11-Co solution in a 1-L Duran bottle was sterilized by autoclaving.



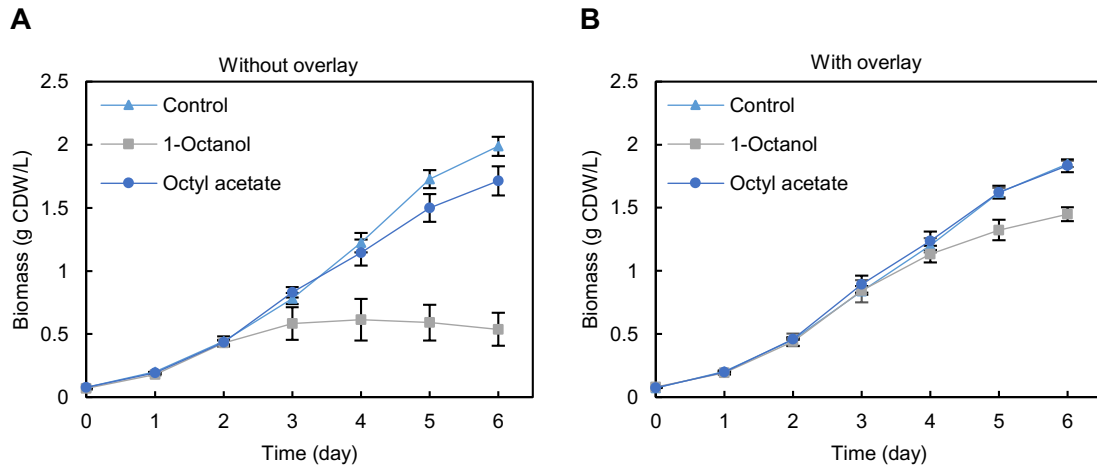

**Fig. S2. Toxicity of externally added octyl acetate or 1-octanol to *Synechocystis* sp. PCC 6803.**

Twenty-five millilitre of *Synechocystis* sp. PCC 6803 lacking acyl-ACP synthetase was cultivated in a 100-ml Erlenmeyer flask with a starting  $OD_{730}$  0.2 at 30°C, 180 rpm (60  $\mu\text{mol photons/m}^2\cdot\text{s}$ , 1%  $\text{CO}_2$ ) in AlgaeTron AG 230 (Photon Systems Instruments). On day 2 onwards, 25 mg/L 1-octanol or octyl acetate was added exogenously every 24 h to the liquid culture in the (A) absence of 10% (v/v) hexadecane solvent overlay and in the (B) presence of 10% (v/v) hexadecane solvent overlay.  $OD_{730}$  was monitored every 24 h.

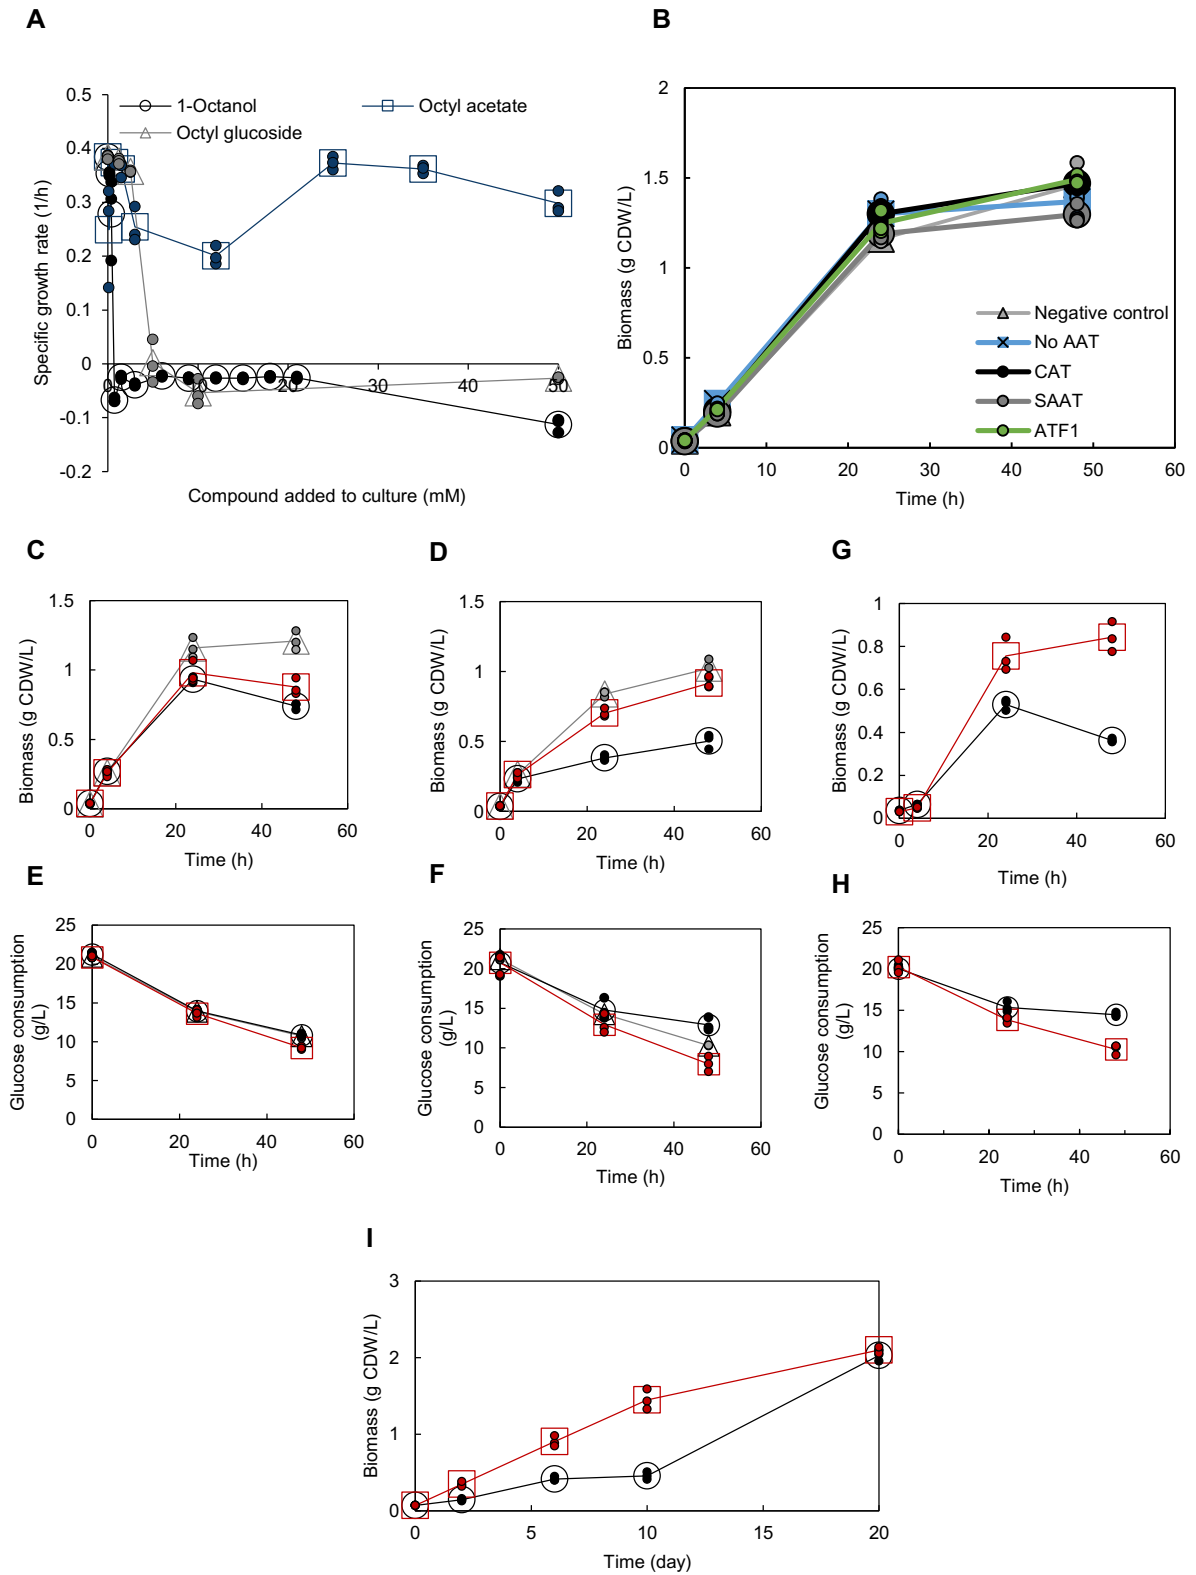

**Fig. S3. Individual data points from (A) Fig 2 (B) Fig 3E (C) Fig 4C (D) Fig 4D (E) Fig 4E (F) Fig 4F (G) Fig 5E (H) Fig 5F (I) Fig 7A.**

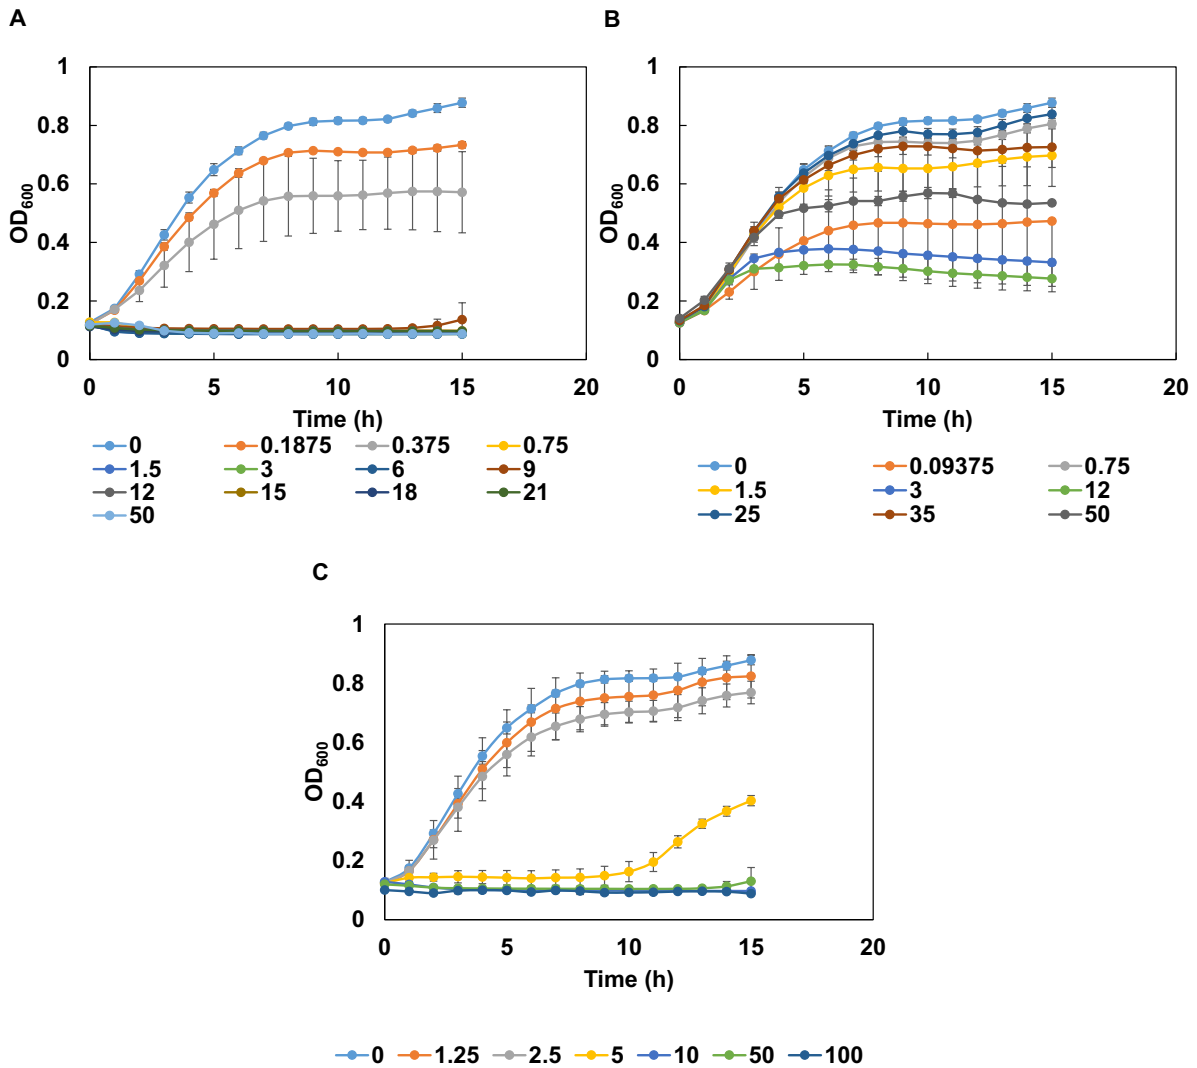

**Fig. S4.** Average growth curves of *E. coli* C43 (DE3) cultivated in M9 media with varying concentrations of (A) 1-octanol (0 – 50 mM), (B) octyl acetate (0 – 50 mM), and (C) octyl glucoside (0 – 100 mM). All cells were cultivated in 96-well microtiter plates at 37°C, and 432 rpm. Data are the average  $\pm$  standard deviation from 3 replicates.



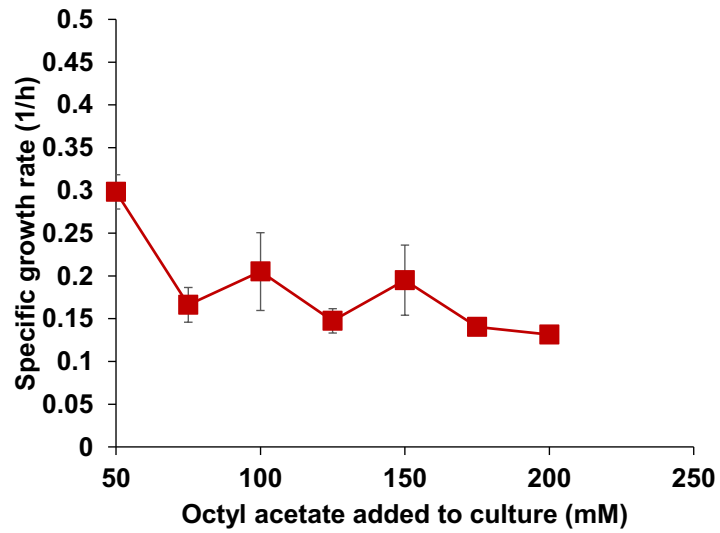

**Fig. S5. Toxicity of octyl acetate.** Specific growth rates of *E. coli* C43 (DE3) cultivated in M9 minimal media with 2% (w/v) glucose at different concentrations (50-200 mM) of octyl acetate added at the beginning of the cultivation. The specific growth rate was calculated using slopes from average growth curves and only considered data in the range of 1-4 h. Data are the average  $\pm$  standard deviation from 3 replicates.

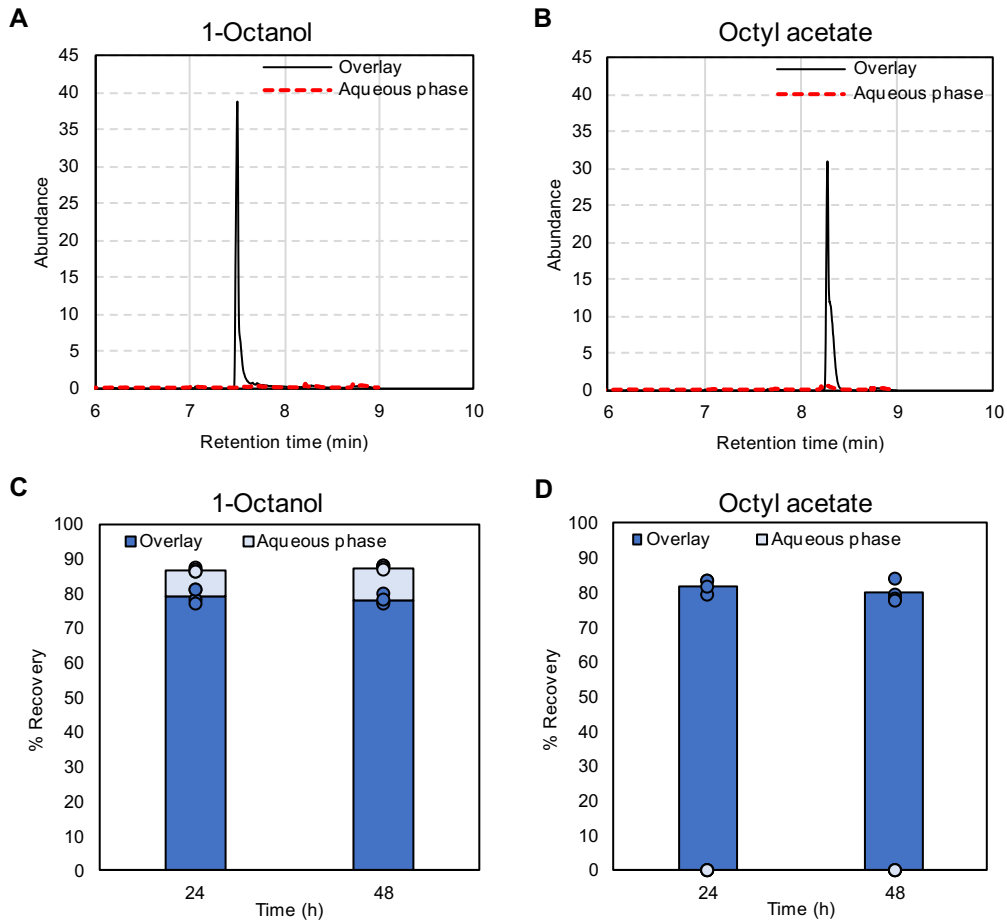

**Fig. S6. Localization of 1-octanol and octyl acetate from mock experiments.** GC-MS chromatograms obtained from hexadecane overlay (overlay) and M9 liquid medium (aqueous phase) when spiked with 1 mM of (A) 1-octanol and (B) octyl acetate after 24 h incubation. Percent recovery of (C) 1-octanol and (D) octyl acetate from hexadecane overlay (overlay) and M9 liquid medium (aqueous phase) when spiked with 500 mg/L of 1-octanol (3.84 mM) or octyl acetate (2.9 mM). The mock experiment used 25 ml M9 liquid media (with 2% (w/v) glucose) overlaid with 10% (v/v) hexadecane. Flasks were incubated at 30°C, 150 rpm for 24 h or 48 h. The M9 liquid medium was extracted with 10% (v/v) hexadecane prior to GC-MS analysis. Data were obtained from four independent replicates.

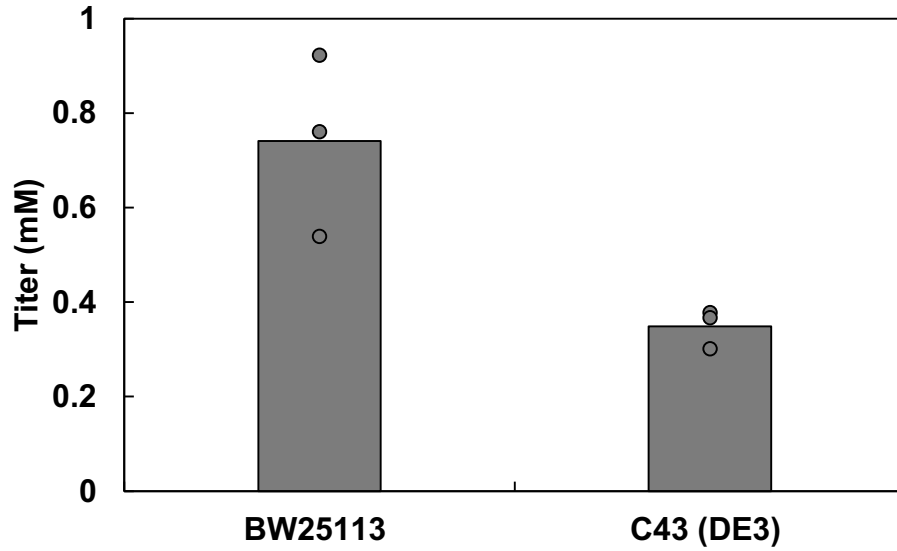

**Fig. S7. 1-octanol production with different *E. coli* strain backgrounds.** *E. coli* BW25113 and C43 (DE3) harboring pET-PA1lacO-1-TPC3 were cultivated in M9 minimal media with 2% (w/v) glucose. Cultures were induced with 0.5 mM IPTG and overlaid with 10% (v/v) hexadecane overlay for 48 h. Data are the average from 3 biological replicates.

**A**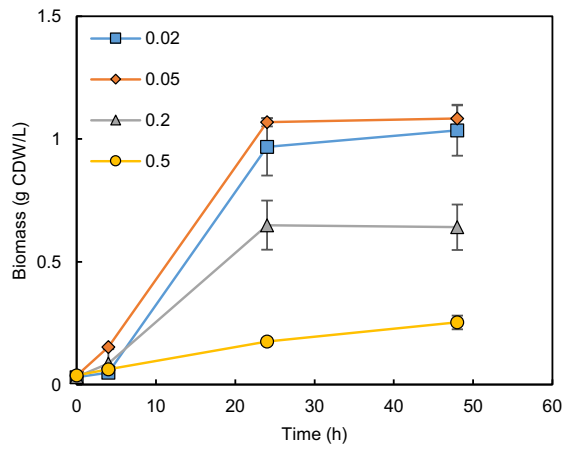**B**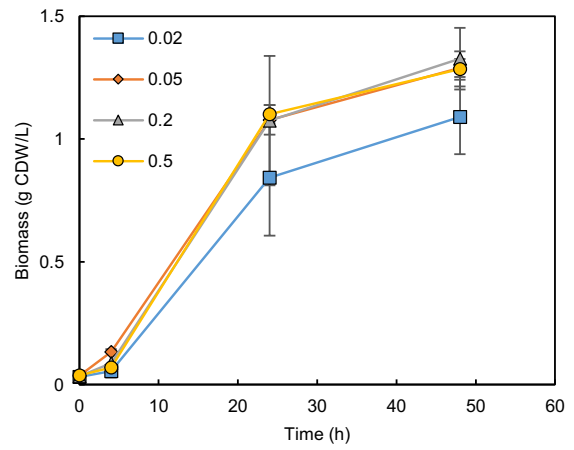

**Fig. S8. Growth of *E. coli* strains harboring different thioesterases.** Average growth of (A) Strain No. 10 ('CpFatB1-4) and (B) 11 ('CaFatB3-5) (Table S1) when cultivated in M9 media with 2% (w/v) glucose overlaid with 10% (v/v) hexadecane overlay with different IPTG used to induce the cultures (0.02, 0.05, 0.2 and 0.5 mM). Data are the average  $\pm$  standard deviation from 3 replicates.

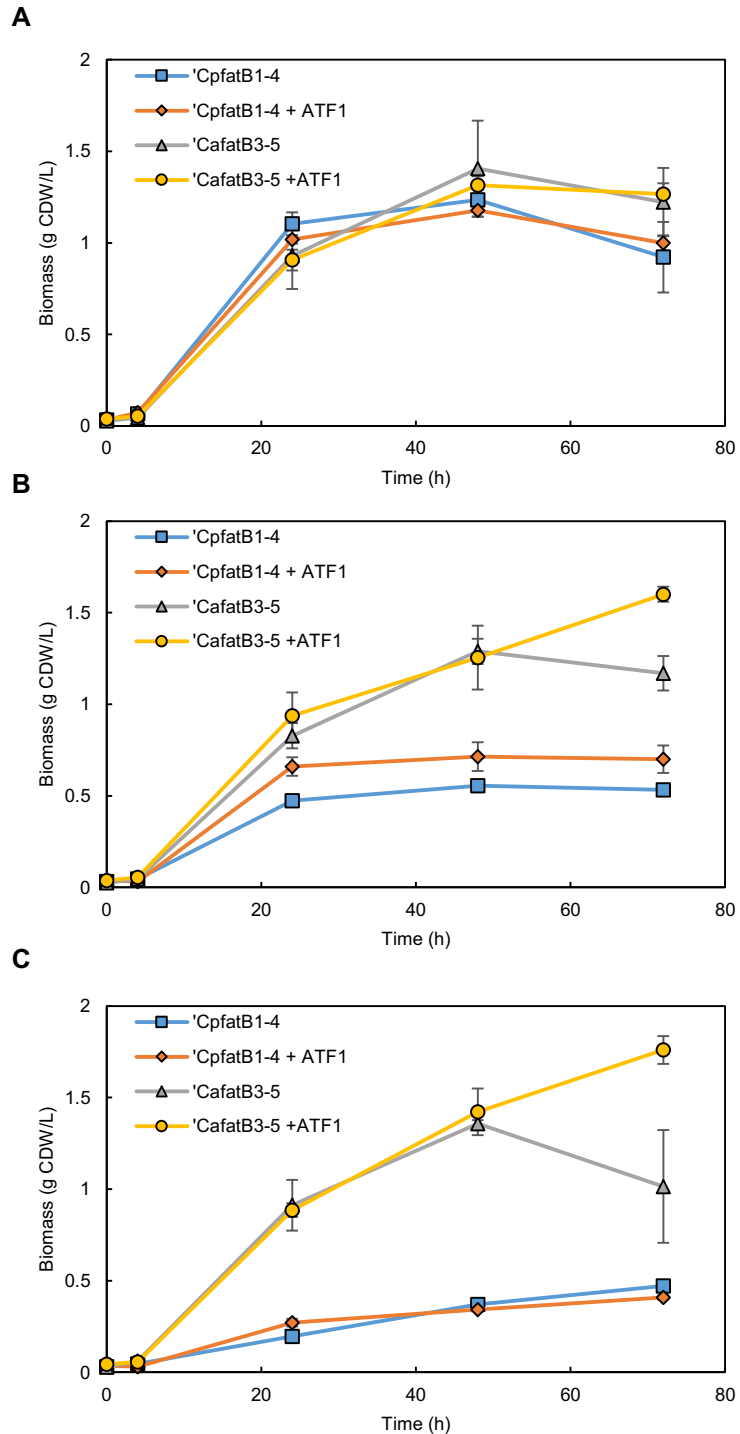

**Fig. S9. Growth of octyl acetate and 1-octanol producing strains in the presence of solvent overlay.** *E. coli* Strains no. 12 ('CpFatB1-4-Sfp-CAR), 14 ('CpFatB1-4-Sfp-CAR + ATF1), 13 ('CaFatB3-5-Sfp-CAR) and, 15 ('CaFatB3-5-Sfp-CAR + ATF1) (Table S1) were cultivated in M9 minimal media with 2% (w/v) glucose and 10% (v/v) hexadecane overlay. Different concentrations of IPTG were used to induce the cultures (A) 0.05, (B) 0.2 and, (C) 0.5 mM.

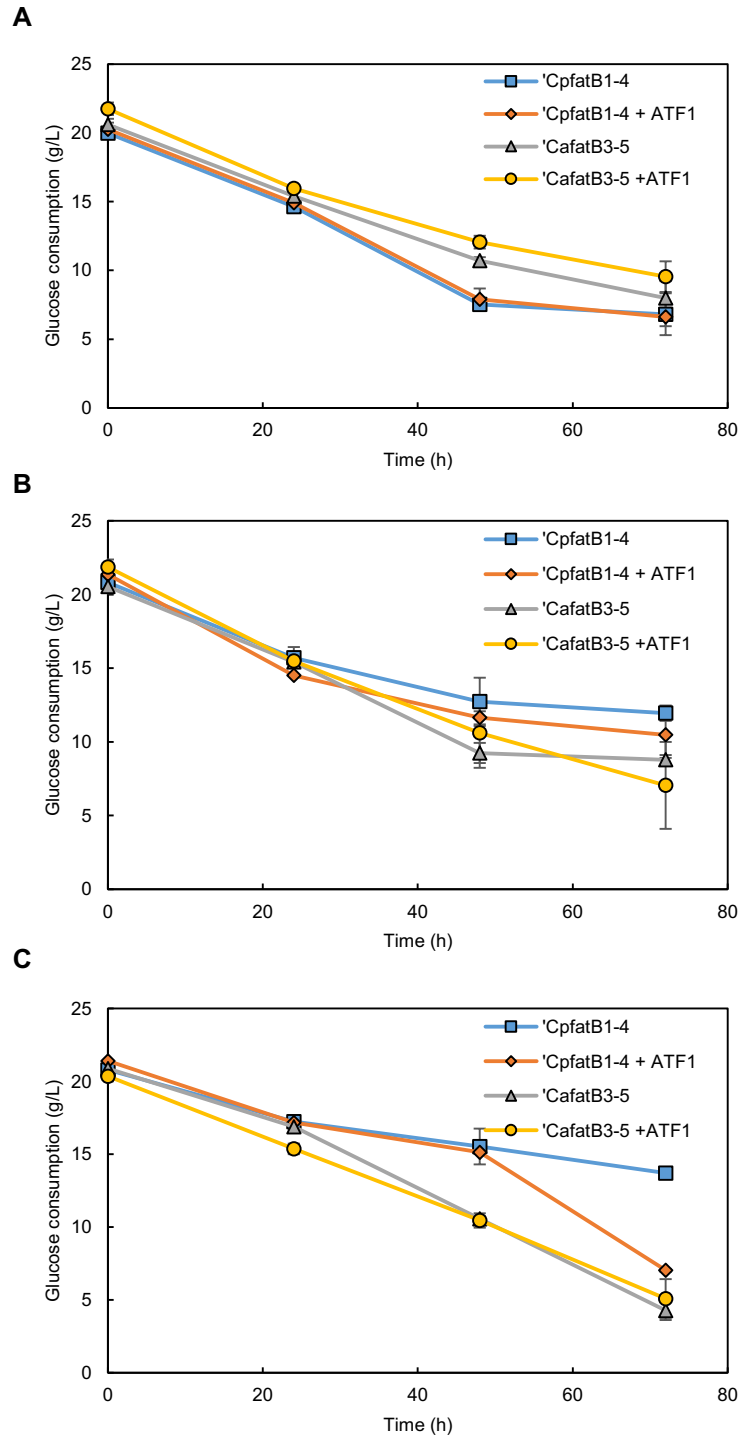

**Fig. S10. Glucose consumption by octyl acetate and 1-octanol producing strains in the presence of solvent overlay.** *E. coli* Strain No. 12 ('CpFatB1-4-Sfp-CAR), 14 ('CpFatB1-4-Sfp-CAR + ATF1), 13 ('CaFatB3-5-Sfp-CAR) and, 15 ('CaFatB3-5-Sfp-CAR + ATF1) (Table S1) were cultivated in M9 minimal media with 2% (w/v) glucose and 10% (v/v) hexadecane overlay. Different concentrations of IPTG were used to induce the cultures (A) 0.05, (B) 0.2 and, (C) 0.5 mM.

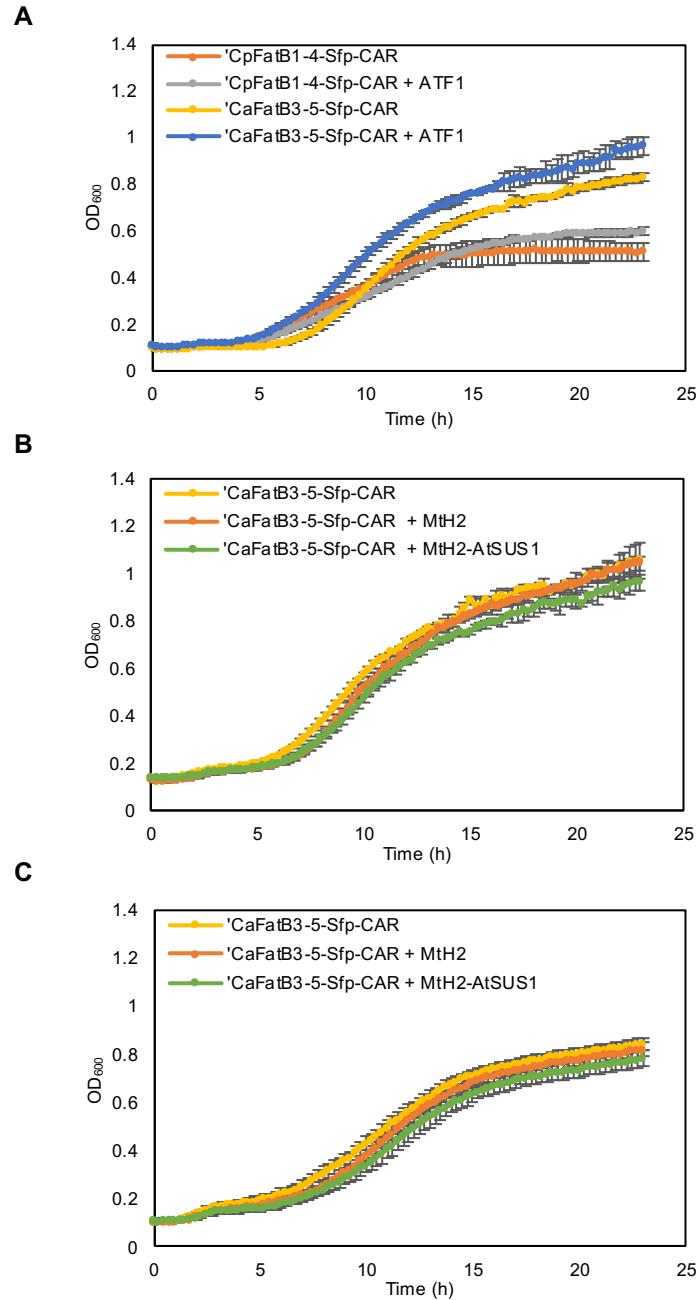

**Fig. S11. Growth of 1-octanol, octyl acetate and octyl glucoside producing strains in a 24-well plate.** (A) *E. coli* Strain No. 12 ('CpFatB1-4-Sfp-CAR), 14 ('CpFatB1-4-Sfp-CAR + ATF1), 13 ('CaFatB3-5-Sfp-CAR) and 15 ('CaFatB3-5-Sfp-CAR + ATF1) (Table S1) were studied in the presence of 10% (v/v) hexadecane. *E. coli* Strains No. 13 ('CaFatB3-5-Sfp-CAR), 19 ('CaFatB3-5-Sfp-CAR + Mth2) and 22 ('CaFatB3-5-Sfp-CAR + Mth2 + AtSUS1) (Table S1) were studied in the (B) presence and (C) absence of 10% (v/v) hexadecane and 15 mM sucrose. All strains were cultivated in M9 minimal media with 2% (w/v) glucose in 24-well microtiter plate at 30°C and 432 rpm. IPTG was used to induce the strains at (A) 0.2 mM and (B), (C) 0.5 mM and (A), (B) solvent overlay was applied at the beginning of the incubation. Data are the average  $\pm$  standard deviation from 4 replicates.

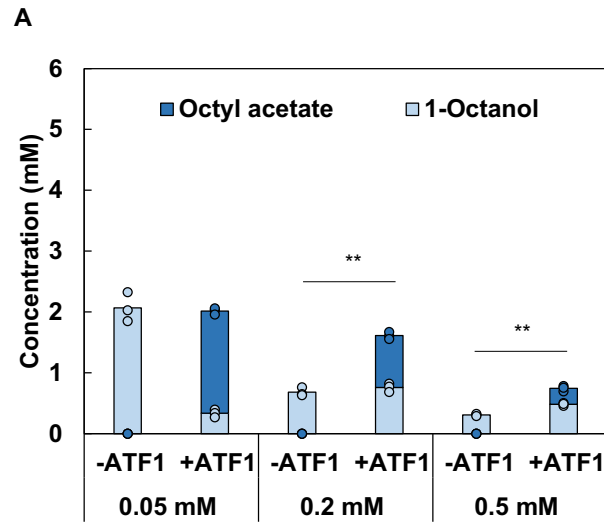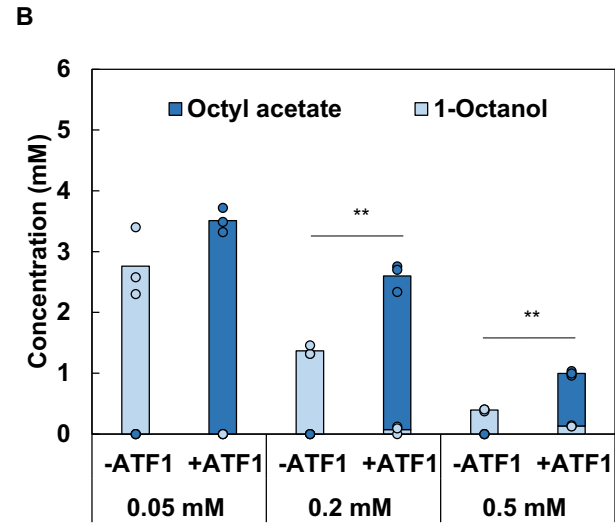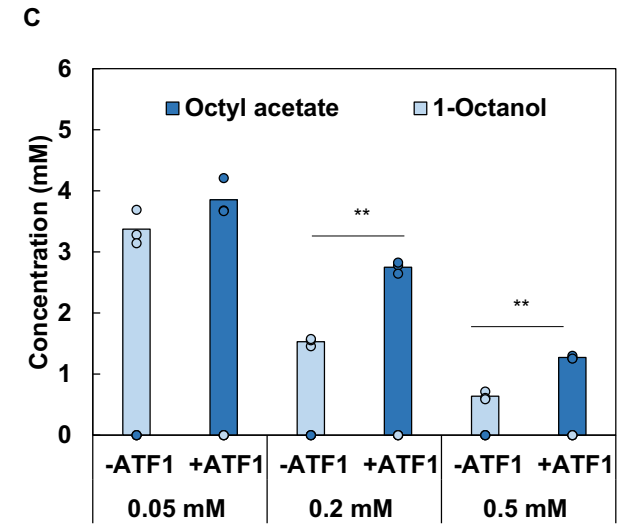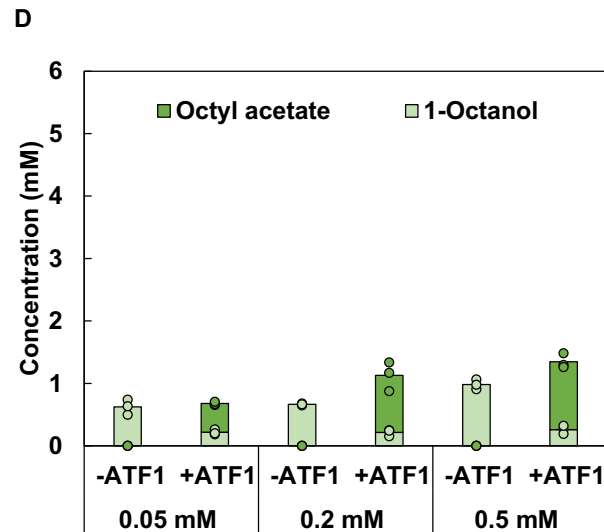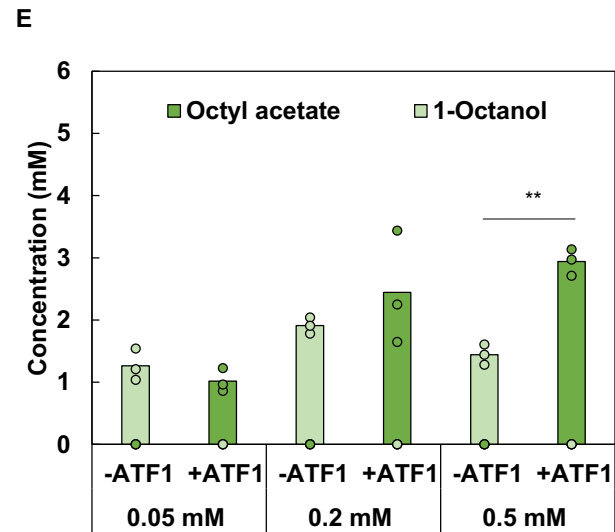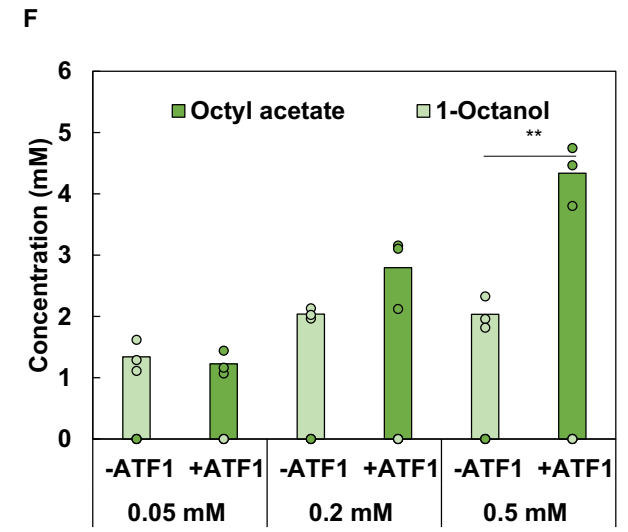



**Fig. S12. Comparison of 1-octanol and octyl acetate production titers.** *E. coli* BW25113 strains 'CpFatB1-4-Sfp-CAR and 'CpFatB1-4-Sfp-CAR + ATF1 were sampled at (A) 24 h, (B) 48 h, (C) 72 h. Similarly, strains 'CaFatB3-5-Sfp-CAR and 'CaFatB3-5-Sfp-CAR + ATF1 were sampled at (D) 24 h, (E) 48 h and (F) 72 h. All strains were cultivated in M9 minimal media with 2% (w/v) glucose and 10% (v/v) hexadecane overlay. Different concentrations of IPTG were used to induce the cultures (0.02, 0.2 and, 0.5mM). \*\* indicates significant difference between 2 treatments ( $p \leq 0.01$ ). Data are the mean from 3 biological replicates

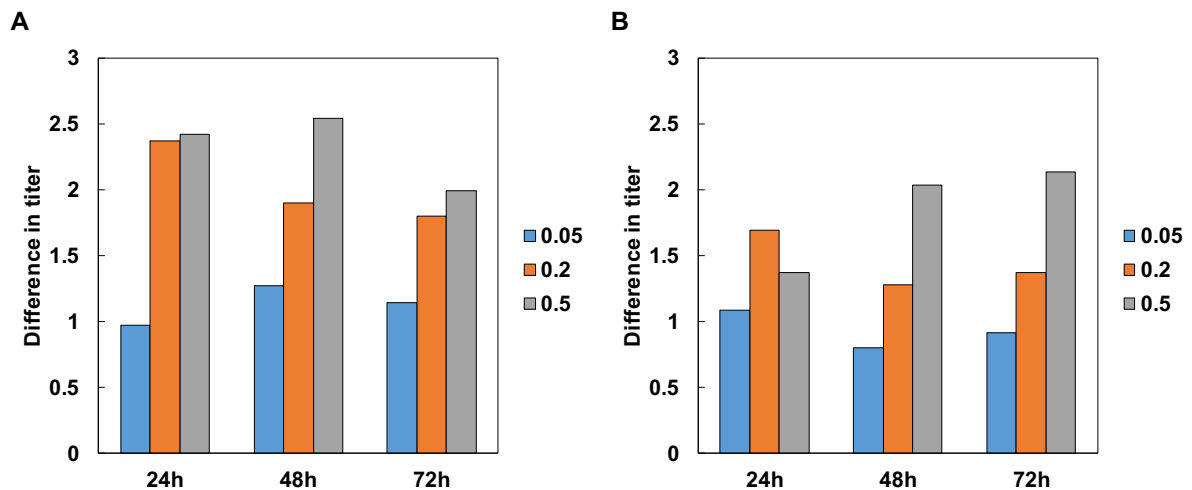

**Fig. S13. The octyl acetate : 1-octanol titer ratio between the octyl acetate and 1-octanol producing strains.** *E. coli* strains (A) 'CpFatB1-4-Sfp-CAR and 'CpFatB1-4-Sfp-CAR + ATF1 and (B) 'CaFatB3-5-Sfp-CAR and 'CaFatB3-5-Sfp-CAR + ATF1 were cultivated in M9 minimal media with 2% (w/v) glucose and 10% (v/v) hexadecane overlay. Different concentrations of IPTG were used to induce the cultures (0.05, 0.2 and 0.5 mM).

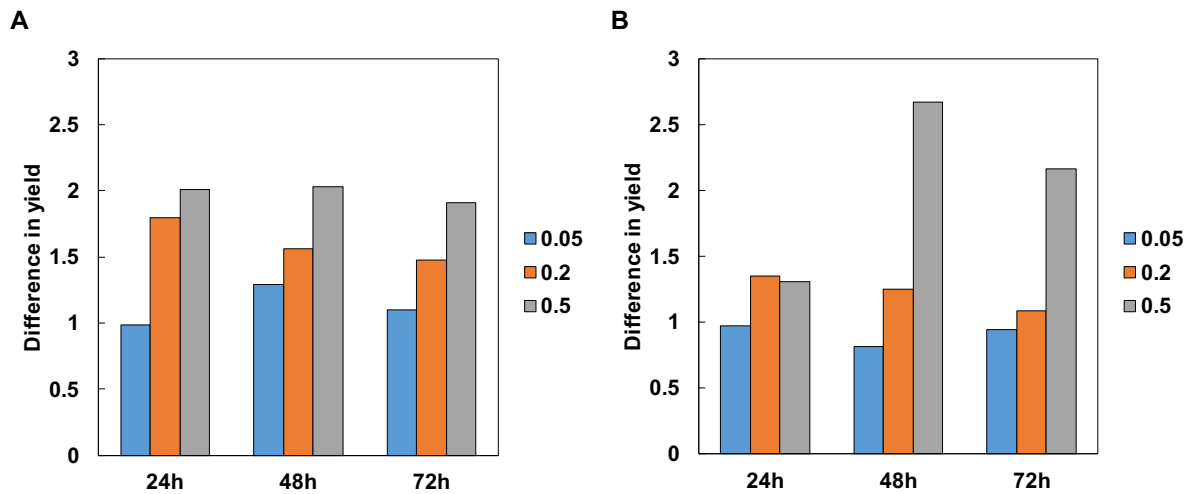

**Fig. S14. The octyl acetate : 1-octanol yield ratio between the octyl acetate and 1-octanol producing strains . *E. coli* strains (A) 'CpFatB1-4-Sfp-CAR and 'CpFatB1-4-Sfp-CAR + ATF1 and (B) 'CaFatB3-5-Sfp-CAR and 'CaFatB3-5-Sfp-CAR + ATF1 were cultivated in M9 minimal media with 2% (w/v) glucose and 10% (v/v) hexadecane overlay. Different concentrations of IPTG were used to induce the cultures (0.05, 0.2 and 0.5 mM).**

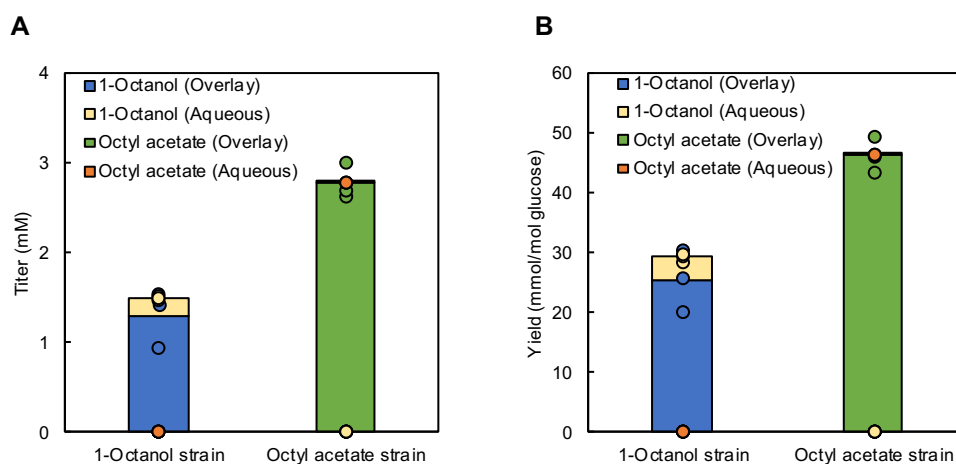

**Fig. S15. Liquid phase partitioning of 1-octanol and octyl acetate accumulating in cultures with the engineered strains.** (A) Titer and (B) yield of 1-octanol and octyl acetate obtained from Strains 'CaFatB3-5-Sfp-CAR and 'CaFatB3-5-Sfp-CAR + ATF1 (Table S1). The strains were cultivated in M9 media with 2% (w/v) glucose induced with 0.5 mM, overlaid with 10% (v/v) hexadecane, and incubated for 48 h. 1-Octanol or octyl acetate obtained from the M9 liquid medium was extracted with 10% (v/v) hexadecane prior to GC-MS analysis. Data were obtained from three biological replicates.

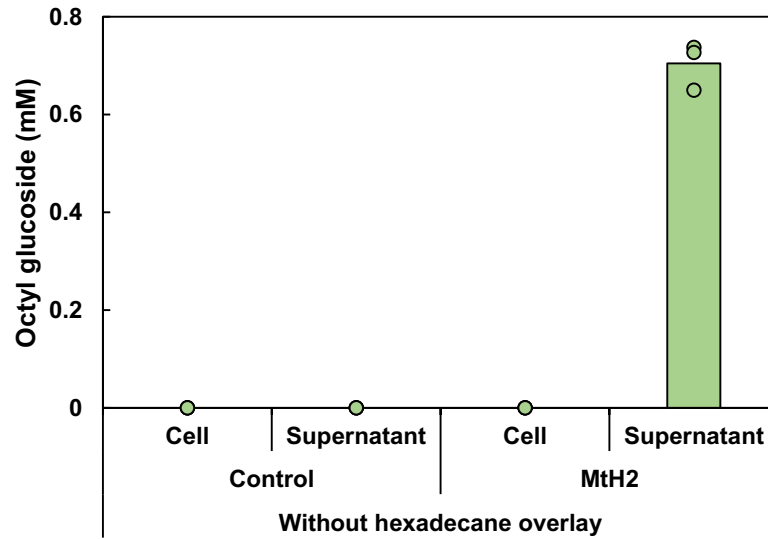

**Fig. S16. Localization of octyl glucoside in the absence of solvent overlay.** *E. coli* BW25113 strains 'CaFatB3-5-Sfp-CAR and 'CaFatB3-5-Sfp-CAR + Mth2 were cultivated in M9 media with 2% (w/v) glucose with 0.5 mM IPTG. The cultures were harvested at centrifuged (17,000 x g, 10 min) to separate culture media and cells. The supernatant was analysed with HPLC. The cell fraction was suspended and lyzed with glass beads (Sigma Aldrich) at 30 hertz for 6 min on TissueLyser II (QIAGEN). After that, the liquid fraction was analysed with HPLC.

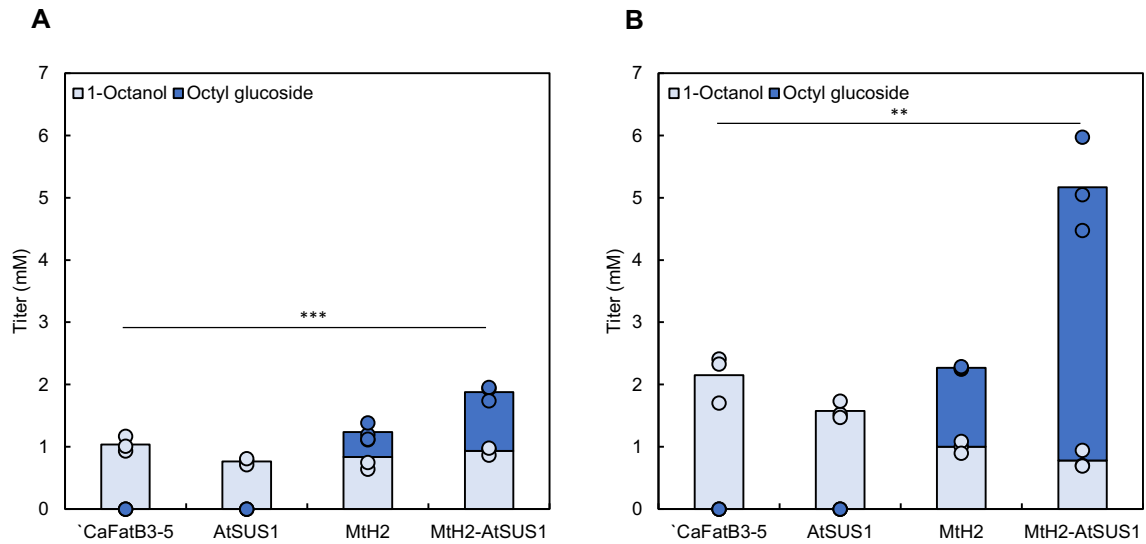

**Fig. S17. Comparison of *in vivo* 1-octanol and octyl glucoside production from *E. coli* BW25113 (titers).** *E. coli* strains 'CaFatB3-5-Sfp-CAR, 'CaFatB3-5-Sfp-CAR + AtSUS1, 'CaFatB3-5-Sfp-CAR + Mth2 and 'CaFatB3-5-Sfp-CAR + Mth2 + AtSUS1 were cultivated in M9 media with 10% (v/v) hexadecane, 2% (w/v) glucose and 15 mM sucrose, and sampled at (A) 24 h (B) 48 h. The asterisk indicates a significant difference by the Student's t-test (\*\*,  $P \leq 0.01$ ; \*\*\*,  $P \leq 0.005$ ). All data are shown as the average from 3 biological replicates and circles represent data from independent biological replicates.

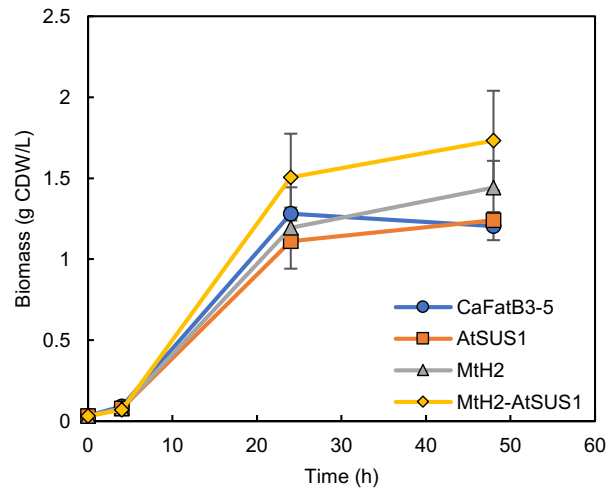

**Fig. S18. Growth of octyl glucoside and 1-octanol producing strains in the presence of solvent overlay.** *E. coli* strains 'CaFatB3-5-Sfp-CAR, 'CaFatB3-5-Sfp-CAR + Mth2, 'CaFatB3-5-Sfp-CAR + AtSUS1, and 'CaFatB3-5-Sfp-CAR + Mth2 + AtSUS1 were cultivated in M9 minimal media with 2% (w/v) glucose, 0.5 mM and 10% (v/v) hexadecane overlay.

**Table S1.** List of *E. coli* strains used in this study

| Strain No. | <i>E. coli</i> strain | ColE1 plasmids                                       | CloDF13 plasmids                            |
|------------|-----------------------|------------------------------------------------------|---------------------------------------------|
| 1          | C43(DE3)              | P <sub>T7</sub> : empty                              | P <sub>T7</sub> : empty                     |
| 2          | C43(DE3)              | P <sub>T7</sub> : <i>tes3, sfp, car</i>              | P <sub>T7</sub> : empty                     |
| 3          | C43(DE3)              | P <sub>T7</sub> : <i>tes3, sfp, car</i>              | P <sub>T7</sub> : <i>cat</i>                |
| 4          | C43(DE3)              | P <sub>T7</sub> : <i>tes3, sfp, car</i>              | P <sub>T7</sub> : <i>saat</i>               |
| 5          | C43(DE3)              | P <sub>T7</sub> : <i>tes3, sfp, car</i>              | P <sub>T7</sub> : <i>atf1</i>               |
| 6          | C43(DE3)              | P <sub>A1lacO-1</sub> : <i>tes3, sfp, car</i>        | -                                           |
| 7          | BW25113               | P <sub>A1lacO-1</sub> : <i>tes3, sfp, car</i>        | -                                           |
| 8          | BW25113               | P <sub>A1lacO-1</sub> : ' <i>CpFatB1, sfp, car</i>   | -                                           |
| 9          | BW25113               | P <sub>A1lacO-1</sub> : ' <i>CaFatB3, sfp, car</i>   | -                                           |
| 10         | BW25113               | P <sub>A1lacO-1</sub> : ' <i>CpFatB1-4, sfp, car</i> | -                                           |
| 11         | BW25113               | P <sub>A1lacO-1</sub> : ' <i>CaFatB3-5, sfp, car</i> | -                                           |
| 12         | BW25113               | P <sub>A1lacO-1</sub> : ' <i>CpFatB1-4, sfp, car</i> | P <sub>A1lacO-1</sub> : empty               |
| 13         | BW25113               | P <sub>A1lacO-1</sub> : ' <i>CaFatB3-5, sfp, car</i> | P <sub>A1lacO-1</sub> : empty               |
| 14         | BW25113               | P <sub>A1lacO-1</sub> : ' <i>CpFatB1-4, sfp, car</i> | P <sub>A1lacO-1</sub> : <i>atf1</i>         |
| 15         | BW25113               | P <sub>A1lacO-1</sub> : ' <i>CaFatB3-5, sfp, car</i> | P <sub>A1lacO-1</sub> : <i>atf1</i>         |
| 16         | BW25113               | P <sub>A1lacO-1</sub> : ' <i>CaFatB3-5, sfp, car</i> | P <sub>A1lacO-1</sub> : <i>AdGT4</i>        |
| 17         | BW25113               | P <sub>A1lacO-1</sub> : ' <i>CaFatB3-5, sfp, car</i> | P <sub>A1lacO-1</sub> : <i>AtGT1</i>        |
| 18         | BW25113               | P <sub>A1lacO-1</sub> : ' <i>CaFatB3-5, sfp, car</i> | P <sub>A1lacO-1</sub> : <i>MtG1</i>         |
| 19         | BW25113               | P <sub>A1lacO-1</sub> : ' <i>CaFatB3-5, sfp, car</i> | P <sub>A1lacO-1</sub> : <i>MtH2</i>         |
| 20         | BW25113               | P <sub>A1lacO-1</sub> : ' <i>CaFatB3-5, sfp, car</i> | P <sub>A1lacO-1</sub> : <i>VvGT1</i>        |
| 21         | BW25113               | P <sub>A1lacO-1</sub> : ' <i>CaFatB3-5, sfp, car</i> | P <sub>A1lacO-1</sub> : <i>AtSUS1</i>       |
| 22         | BW25113               | P <sub>A1lacO-1</sub> : ' <i>CaFatB3-5, sfp, car</i> | P <sub>A1lacO-1</sub> : <i>MtH2, AtSus1</i> |

**Table S2.** List of *Synechocystis* sp. PCC 6803 strains used in this study

| <b>Strain No.</b> | <b>Cyanobacterial strain</b>                                           | <b>RSF1010-based plasmid</b>           |
|-------------------|------------------------------------------------------------------------|----------------------------------------|
| 1                 | 6803- $\Delta$ <i>aas</i>                                              | -                                      |
| 2                 | 6803- $\Delta$ <i>aas</i> -PnrsB-Sfp-CAR                               | -                                      |
| 3                 | 6803- $\Delta$ <i>aas</i> -PnrsB-Sfp-CAR-Pcoa-' <i>CpFatB1-4</i>       | Pcoa: ' <i>CpFatB1-4</i>               |
| 4                 | 6803- $\Delta$ <i>aas</i> -PnrsB-Sfp-CAR-Pcoa-' <i>CpFatB1-4</i> -SAAT | Pcoa: ' <i>CpFatB1-4</i> , <i>saat</i> |



**Table S3. Source organisms of overexpressed genes in this study**

| Gene                          | Source organism                                | UniProtKB  | Reference                          |
|-------------------------------|------------------------------------------------|------------|------------------------------------|
| <i>tes3</i>                   | <i>Anaerococcus tetradius</i>                  | C2CIR4     | (Akhtar et al., 2015)              |
| <i>sfp</i>                    | <i>Bacillus subtilis</i>                       | P39135     | (Akhtar et al., 2015)              |
| <i>car</i>                    | <i>Mycobacterium marinum</i>                   | B2HN69     | (Akhtar et al., 2015)              |
| <i>cat</i>                    | <i>Escherichia coli</i>                        | P62577     | (Röttig and Steinbüchela, 2013)    |
| <i>saat</i>                   | <i>Fragaria ananassa</i> cv.<br><i>Elsanta</i> | Q9FVF1     | (Aharoni et al., 2000)             |
| <i>atf1</i>                   | <i>Saccharomyces cerevisiae</i>                | P40353     | (Verstrepen et al., 2003)          |
| <i>CpFatB1</i><br>(wild type) | <i>Cuphea palustris</i>                        | Q39554     | (Dehesh et al., 1996)              |
| <i>CaFatB3</i><br>(wild type) | <i>Cuphea avigera pulcherrima</i>              | V9MHU7     | (Tjellstrom et al., 2013)          |
| ' <i>CpFatB1-4</i>            | <i>Cuphea palustris</i>                        | -          | (Hernandez Lozada et al., 2018)    |
| ' <i>CaFatB3-5</i>            | <i>Cuphea avigera pulcherrima</i>              | -          | This work                          |
| <i>AdGT4</i>                  | <i>Actinidia deliciosa</i>                     | A0A077EMP8 | (Yauk et al., 2014)                |
| <i>VvGT1</i>                  | <i>Vitis vinifera</i>                          | P51094     | (Christopher M. Ford et al., 1998) |
| <i>AtGT1</i>                  | <i>Arabidopsis thaliana</i>                    | Q9M156     | (Lim et al., 2002)                 |
| <i>MtG1</i>                   | <i>Medicago truncatula</i>                     | Q5IFH7     | (Shao et al., 2005)                |
| <i>MtH2</i>                   | <i>Medicago truncatula</i>                     | A6XNC5     | (Li et al., 2007)                  |
| <i>AtSUS1</i>                 | <i>Arabidopsis thaliana</i>                    | P49040     | (Zheng et al., 2011)               |

If the genes were from foreign organisms, codon optimization was carried out prior to synthesis in order to overexpress in bacteria.

**Table S4. List of templates and primers used for gene(s) amplification**

| <b>Gene</b>    | <b>Template</b>       | <b>Primer sequence (5' – 3')</b>                                                                            |
|----------------|-----------------------|-------------------------------------------------------------------------------------------------------------|
| <i>cat</i>     | pACYC-                | Forward: TCTGGTGGGTCTCTGTCCatggagaaaaaaatcactggatataccaccg                                                  |
|                | petF-fpr <sup>a</sup> | Reverse: CGATAGGTCTCCCGAGCCttacgccccgcctgc                                                                  |
| <i>saat</i>    | pJET-                 | Forward: TCTGGTGGGTCTCTGTCCATG                                                                              |
|                | SAAT                  | Reverse: CGATAGGTCTCCCGAGCC                                                                                 |
| <i>atf1</i>    | pJET-                 | Forward: TCTGGTGGGTCTCTGTCCATG                                                                              |
|                | ATF1                  | Reverse: CGATAGGTCTCCCGAGCC                                                                                 |
| <i>gfp</i>     | pJET-                 | Forward: GGCCATGGTCTGGTGGGTCTCTGTCC                                                                         |
|                | GFP                   | Reverse: GGCCTAGGCGATAGGTCTCCCGAGCC                                                                         |
| <i>tes3</i>    | pET-                  | Forward:                                                                                                    |
|                | TPC3                  | TCTGGTGGGTCTCTGTCCATGAAATTTAAAAAAAATTTAAAATTGGGCG<br>GATGCACG                                               |
|                |                       | Reverse:<br>CGATAGGTCTCCCGAGCCTTACACGTTAGTTTTAATTTTCCCCAACAGT<br>AGTCC                                      |
| <i>sfp-car</i> | pET-                  | Forward:                                                                                                    |
|                | TPC3                  | TCTGGTGGGTCTCTGTCCATGAAGATCTACGGCATATACATGGACC<br>Reverse: CGATAGGTCTCCCGAGCCgtggcagcagcctaggggaattcttacagc |

<sup>a</sup>Kallio et al., 2014, *Nature communications*

**Table S5. DNA linkers used to generate plasmid constructs by BASIC assembly**

| Name     | Prefix linker                             |                             |
|----------|-------------------------------------------|-----------------------------|
|          | Linker sequence (5' to 3')                | Adapter sequence (5' to 3') |
| 1MP      | GGACAGAGACCCACCAGATAATAGTGTTCACGAAGTG     | TCTGGTGGGT/iMe-dC/TCT       |
| 2MP      | GGACGATTCCGAAGTTACACCAGATTGGACTGTTATTAC   | AACTTCGGAATC                |
| 1P       | GGACTAGTTCAATAAATACCCTCTGACTGTCTCGGAG     | TTTATTGAACTA                |
| 2P       | GGACAGGTAATAAGAACTACACGACTGGATACTGACT     | TTCTTATTACCT                |
| 3P       | GGACTCTGTAATAACAATACCGATAAAGCAACGAGTG     | TGTTATTACAGA                |
| LRBS1-3P | GGACTATTTCTCCTCTTTTTTACAACCTGATACTTACCTGA | AAAGAGGAGAAATA              |
| LRBS2-3P | GGACTATTTCTCCTCTTTTTTCTGCTACCCTTATCTCAG   | AAAGAGGAGAAATA              |

  

| Name     | Suffix linker                         |                             |
|----------|---------------------------------------|-----------------------------|
|          | Linker sequence (5' to 3')            | Adapter sequence (5' to 3') |
| 1MS      | CTCGGGTAAGAACTCGCACTTCGTGGAAACACTATTA | CGAGTTCTTACC                |
| 2MS      | nTATCGGTAATAACAGTCCAATCTGGTGT         | CGATAGGT/iMe-dC/TCC         |
| 1S       | CTCGTTACTTACGACACTCCGAGACAGTCAGAGGGTA | TGTCGTAAGTAA                |
| 2S       | CTCGATCGGTGTGAAAAGTCAGTATCCAGTCGTGTAG | TTTCACACCGAT                |
| 3S       | CTCGATCACGGCACTACACTCGTTGCTTTATCGGTAT | TAGTGCCGTGAT                |
| LRBS1-XS | CTCGTTGAACACCGTCTCAGGTAAGTATCAGTTGTAA | GACGGTGTTCAA                |
| LRBS2-XS | CTCGTGTTACTATTGGCTGAGATAAGGGTAGCAGAAA | CCAATAGTAACA                |

**Table S6. Plasmids used for construct preparation in this study.**

| No. | Prefix   | Plasmid            | Suffix   | Plasmid generated                 | Relevant information                                                                                                              |
|-----|----------|--------------------|----------|-----------------------------------|-----------------------------------------------------------------------------------------------------------------------------------|
| 1   | 3P       | pJET-Cole1-rop-bom | 1S       | pET- PA1lacO-1-GFP                | A plasmid used as a backbone for BASIC assembly with Cole1 origin of replication, pA1lacO1 promoter and kanamycin resistance.     |
|     | 1P       | pJET- PA1lacO-1    | 2MS      |                                   |                                                                                                                                   |
|     | 2MP      | pJET-GFP           | 1MS      |                                   |                                                                                                                                   |
|     | 1MP      | pJET-termB15       | 2S       |                                   |                                                                                                                                   |
|     | 2P       | pJET-Kan           | 3S       |                                   |                                                                                                                                   |
| 2   | 1P       | pJET-CloDF-Spec    | 2S       | pCDF- PA1lacO-1-GFP               | A plasmid used as a backbone for BASIC assembly with CloDF origin of replication, pA1lacO1 promoter and spectinomycin resistance. |
|     | 2P       | pJET- PA1lacO-1    | 2MS      |                                   |                                                                                                                                   |
|     | 2MP      | pJET-GFP           | 1MS      |                                   |                                                                                                                                   |
|     | 1MP      | pJET-termB15       | 1S       |                                   |                                                                                                                                   |
| 3   | 2P       | pET-GFP            | LRBS1-XS | pET- PA1lacO-1-TPC3               | A plasmid encoding Tes3, Sfp and CAR.                                                                                             |
|     | LRBS1-3P | pJET-Tes3          | LRBS2-XS |                                   |                                                                                                                                   |
|     | LRBS2-3P | pJET-Sfp-CAR       | 2S       |                                   |                                                                                                                                   |
| 4   | 2P       | pET-GFP            | LRBS1-XS | pET- PA1lacO-1-'CpFatB1-Sfp-CAR   | A plasmid encoding 'CpFatB1, Sfp and CAR.                                                                                         |
|     | LRBS1-3P | pJET-'CpFatB1      | LRBS2-XS |                                   |                                                                                                                                   |
|     | LRBS2-3P | pJET-Sfp-CAR       | 2S       |                                   |                                                                                                                                   |
| 5   | 2P       | pET-GFP            | LRBS1-XS | pET- PA1lacO-1-'CaFatB3-Sfp-CAR   | A plasmid encoding 'CaFatB3, Sfp and CAR.                                                                                         |
|     | LRBS1-3P | pJET-'CaFatB3      | LRBS2-XS |                                   |                                                                                                                                   |
|     | LRBS2-3P | pJET-Sfp-CAR       | 2S       |                                   |                                                                                                                                   |
| 6   | 2P       | pET-GFP            | LRBS1-XS | pET- PA1lacO-1-'CpFatB1-4-Sfp-CAR | A plasmid encoding 'CpFatB1-4, Sfp and CAR.                                                                                       |
|     | LRBS1-3P | pJET-'CpFatB1-4    | LRBS2-XS |                                   |                                                                                                                                   |
|     | LRBS2-3P | pJET-Sfp-CAR       | 2S       |                                   |                                                                                                                                   |
| 7   | 2P       | pET-GFP            | LRBS1-XS | pET- PA1lacO-1-'CaFatB3-5-Sfp-CAR | A plasmid encoding 'CaFatB3-5, Sfp and CAR.                                                                                       |
|     | LRBS1-3P | pJET-'CaFatB3-5    | LRBS2-XS |                                   |                                                                                                                                   |

|    |          |                       |          |                                   |                                        |
|----|----------|-----------------------|----------|-----------------------------------|----------------------------------------|
|    | LRBS2-3P | pJET-Sfp-CAR          | 2S       |                                   |                                        |
| 8  | 2P       | pCDF-GFP              | LRBS1-XS | pCDF- PA1lacO-1-ATF1              | A plasmid encoding ATF1                |
|    | LRBS1-3P | pJET-ATF1             | 2S       |                                   |                                        |
| 9  | 2P       | pCDF-GFP              | 2S       | pCDF- PA1lacO-1-empty             | A negative control plasmid             |
| 10 | 1P       | pRSF1010-Ery-Pcoa-GFP | LRBS1-XS | pRSF1010-Ery-Pcoa-'CpFatB1-4      | A plasmid encoding 'CpFatB1-4          |
|    | LRBS1-4P | pJET-'CpFatB1-4       | 1S       |                                   |                                        |
| 11 | 1P       | pRSF1010-Ery-Pcoa-GFP | LRBS1-XS | pRSF1010-Ery-Pcoa-'CpFatB1-4-SAAT | A plasmid encoding 'CpFatB1-4 and SAAT |
|    | LRBS1-4P | pJET-'CpFatB1-4       | LRBS2-XS |                                   |                                        |
|    | LRBS2-4P | pJET-SAAT             | 1S       |                                   |                                        |
| 12 | 2P       | pCDF-GFP              | LRBS1-XS | pCDF- PA1lacO-1-AdGT4             | A plasmid encoding AdGT4               |
|    | LRBS1-3P | pJET-AdGT4            | 2S       |                                   |                                        |
| 13 | 2P       | pCDF-GFP              | LRBS1-XS | pCDF- PA1lacO-1-AtGT1             | A plasmid encoding AtGT1               |
|    | LRBS1-3P | pJET-AtGT1            | 2S       |                                   |                                        |
| 14 | 2P       | pCDF-GFP              | LRBS1-XS | pCDF- PA1lacO-1-MtG1              | A plasmid encoding MtG1                |
|    | LRBS1-3P | pJET-MtG1             | 2S       |                                   |                                        |
| 15 | 2P       | pCDF-GFP              | LRBS1-XS | pCDF- PA1lacO-1-Mth2              | A plasmid encoding Mth2                |
|    | LRBS1-3P | pJET-Mth2             | 2S       |                                   |                                        |
| 16 | 2P       | pCDF-GFP              | LRBS1-XS | pCDF- PA1lacO-1-VvGT1             | A plasmid encoding VvGT1               |
|    | LRBS1-3P | pJET-Vv               | 2S       |                                   |                                        |
| 17 | 2P       | pCDF-GFP              | LRBS1-XS | pCDF- PA1lacO-1-Mth2-AtSUS1       | A plasmid encoding Mth2 and AtSUS1     |
|    | LRBS1-3P | pJET-Mth2             | LRBS2-XS |                                   |                                        |
|    | LRBS2-3P | pACIDT-AtSUS1         | 2S       |                                   |                                        |
| 18 | 2P       | pCDF-GFP              | LRBS1-XS | pCDF- PA1lacO-1-AtSUS1            | A plasmid encoding AtSUS1              |
|    | LRBS1-3P | pACIDT-AtSUS1         | 2S       |                                   |                                        |

**Table S7. Summary of plasmid construction via traditional restriction cloning**

| Plasmid used | Ligated fragment          |             | Relevant information            |
|--------------|---------------------------|-------------|---------------------------------|
|              | Plasmid backbone          | Insert      |                                 |
| pCDF-CAT     | pCDF-GFP (Bsal)           | Cat (Bsal)  | A plasmid encoding CAT protein  |
| pCDF-SAAT    | pCDF-GFP (Bsal)           | Saat (Bsal) | A plasmid encoding SAAT protein |
| pCDF-ATF1    | pCDF-GFP (Bsal)           | Atf1 (Bsal) | A plasmid encoding ATF1 protein |
| pCDF-empty   | pCDF-GFP (Bsal)           | -           | A negative control plasmid      |
| pET-empty    | pET-TPC3 (NcoI and AvrII) | -           | A negative control plasmid      |

The *GFP* encoding gene was amplified from pJET-GFP using oligonucleotides with NcoI and AvrII cutting sites for the construction of pCDF-GFP plasmid backbone. The amplified GFP was then cloned into pCDF-Ahr<sub>his</sub> by replacing Ahr<sub>his</sub> with *GFP*. *cat* was amplified from pACYC-petF-fpr with Bsal prefix and suffix, while SAAT and ATF1 were order as a gblock from IDT technology. All 3 genes were cloned into pCDF-GFP backbone. To construct empty plasmids, pET-TPC4 was digested with NcoI and AvrII and pCDF-GFP was digested with Bsal. Both backbones were recirculated using Quick Blunting™ and Quick Ligation™ Kits from NEB after restriction digestion.

**Table S8. Plasmids used for production in this study**

| Plasmid Name                      | Genotype                                             | Reference             |
|-----------------------------------|------------------------------------------------------|-----------------------|
| pET-TPC3                          | ColE1; CmR; P <sub>T7</sub> : <i>tes3, sfp, car</i>  | (Akhtar et al., 2015) |
| pCDF-P <sub>T7</sub> -empty       | CloDF13; SpecR; P <sub>T7</sub> :                    | This work             |
| pET-P <sub>T7</sub> -empty        | ColE1; CmR; P <sub>T7</sub> :                        | This work             |
| pCDF-P <sub>T7</sub> -CAT         | CloDF13; SpecR; P <sub>T7</sub> : <i>cat</i>         | This work             |
| pCDF-P <sub>T7</sub> -SAAT        | CloDF13; SpecR; P <sub>T7</sub> : <i>saat</i>        | This work             |
| pCDF-P <sub>T7</sub> -ATF1        | CloDF13; SpecR; P <sub>T7</sub> : <i>atf1</i>        | This work             |
| pET- PA1lacO-1-TPC3               | ColE1; KanR; PA1lacO-1: <i>tes3, sfp, car</i>        | This work             |
| pET- PA1lacO-1-'CpFatB1-Sfp-CAR   | ColE1; KanR; PA1lacO-1: ' <i>CpFatB1-3, sfp, car</i> | This work             |
| pET- PA1lacO-1-'CaFatB3-Sfp-CAR   | ColE1; KanR; PA1lacO-1: ' <i>CaFatB3, sfp, car</i>   | This work             |
| pET- PA1lacO-1-'CpFatB1-4-Sfp-CAR | ColE1; KanR; PA1lacO-1: ' <i>CpFatB1-4, sfp, car</i> | This work             |
| pET- PA1lacO-1-'CaFatB3-5-Sfp-CAR | ColE1; KanR; PA1lacO-1: ' <i>CaFatB3-5, sfp, car</i> | This work             |
| pCDF- PA1lacO-1-empty             | CloDF13; SpecR; PA1lacO-1:                           | This work             |
| pCDF- PA1lacO-1-ATF1              | CloDF13; SpecR; PA1lacO-1: <i>atf1</i>               | This work             |
| pRSF1010-Ery-Pcoa-'CpFatB1-4      | RSF1010; EryR; Pcoa: ' <i>CpFatB1-4</i>              | This work             |
| pRSF1010-Ery-Pcoa-'CpFatB1-4-SAAT | RSF1010; EryR; Pcoa: ' <i>CpFatB1-4, saat</i>        | This work             |
| pCDF- PA1lacO-1-AdGT4             | CloDF13; SpecR; PA1lacO-1: <i>AdGT4</i>              | This work             |
| pCDF- PA1lacO-1-AtGT1             | CloDF13; SpecR; PA1lacO-1: <i>AtGT1</i>              | This work             |
| pCDF- PA1lacO-1-MtG1              | CloDF13; SpecR; PA1lacO-1: <i>MtG1</i>               | This work             |
| pCDF- PA1lacO-1-MtH2              | CloDF13; SpecR; PA1lacO-1: <i>MtH2</i>               | This work             |
| pCDF- PA1lacO-1-VvGT1             | CloDF13; SpecR; PA1lacO-1: <i>VvGT1</i>              | This work             |
| pCDF- PA1lacO-1-AtSUS1            | CloDF13; SpecR; PA1lacO-1: <i>AtSUS1</i>             | This work             |
| pCDF- PA1lacO-1-MtH2-AtSUS1       | CloDF13; SpecR; PA1lacO-1: <i>MtH2, AtSUS1</i>       | This work             |

**Table S9. List of DNA templates and primers used to generate genetic parts for the construction of the suicide plasmid targeting phaAB site**

| Template                                                  | Primer |       | Plasmid Generated | Plasmid Contained            | Relevant information                                                                                                                         |
|-----------------------------------------------------------|--------|-------|-------------------|------------------------------|----------------------------------------------------------------------------------------------------------------------------------------------|
|                                                           | F      | R     |                   |                              |                                                                                                                                              |
| <b>Genetic Part 1 - Upstream homology region</b>          |        |       |                   |                              |                                                                                                                                              |
| DNA chromosome <sup>a</sup>                               | IY224  | IY225 | pIY442            | pJET:: <i>phaAB</i> _U<br>HR | Plasmid containing a <i>lacI</i> repressor gene and P <sub>clac143</sub> promoter.                                                           |
| <b>Genetic Part 2 – Downstream homology region</b>        |        |       |                   |                              |                                                                                                                                              |
| DNA chromosome <sup>a</sup>                               | IY226  | IY227 | pIY443            | pJET:: <i>phaAB</i> _D<br>HR | Plasmid containing P <sub>nrsB</sub> promoter.                                                                                               |
| <b>Genetic Part 3 – Promoter</b>                          |        |       |                   |                              |                                                                                                                                              |
| DNA chromosome <sup>a</sup>                               | PB210  | PB211 | pIY171            | pJET::P <sub>nrsB</sub>      | Plasmid containing P <sub>nrsB</sub> promoter.                                                                                               |
| <b>Genetic Part 4 – GFP dropout gene</b>                  |        |       |                   |                              |                                                                                                                                              |
| -                                                         | -      | -     | pIY24             | pJET:: <i>gfp</i>            | Superfold green fluorescence (GFP) gene ordered as a gBlock.                                                                                 |
| <b>Genetic Part 5 – Spectinomycin resistance cassette</b> |        |       |                   |                              |                                                                                                                                              |
| -                                                         | PB29   | PB30  | pIY98             | pJET::Sp <sup>R</sup>        | Spectinomycin resistance cassette was ordered as a gBlock.                                                                                   |
| <b>Genetic Part 6 – Terminator</b>                        |        |       |                   |                              |                                                                                                                                              |
| -                                                         | -      | -     | pIY67             | pJET::termB15                | Plasmid storage containing rrnB T1 terminator and T7Te terminator.                                                                           |
| <b>Genetic Part 7 &amp; 8 – Backbone</b>                  |        |       |                   |                              |                                                                                                                                              |
| -                                                         | -      | -     | pIY99             | pColE1:: <i>gfp</i><br>KanR  | Plasmid backbone for plasmid propagation in <i>E. coli</i> with a kanamycin selection marker cassette and a GFP dropout gene                 |
| -                                                         | -      | -     | pIY23             | pColE1::AmpR                 | Plasmid backbone for plasmid propagation in <i>E. coli</i> with a carbenicillin selection marker cassette (requested from Dr. Geoff Baldwin) |
| <b>Gene of interest</b>                                   |        |       |                   |                              |                                                                                                                                              |
| pET-TPC3 <sup>b</sup>                                     | IY234  | IY155 | pIY485            | pJET-Sfp-CAR                 | Plasmid storage containing Sfp and CAR.                                                                                                      |

<sup>a</sup>*Synechocystis* sp. PCC 6803 wild-type strain

<sup>b</sup>Akhtar et al., *Metabolic Engineering Communications*, 2015



**Table S10. List of genetic parts and linkers used to construct plasmid pLY453 and pLY454**

| <b>Prefix Linker</b> | <b>Plasmid</b> | <b>Genetic part</b>    | <b>Suffix Linker</b> | <b>Plasmid generated</b> | <b>Relevant Information</b>                                                                                             |
|----------------------|----------------|------------------------|----------------------|--------------------------|-------------------------------------------------------------------------------------------------------------------------|
| 1MP                  | pLY442         | phaAB_UHR              | 1S                   | pLY453                   | pLY453 is the plasmid carrying the upstream genetic parts for the construction of suicide vector targeting phaAB site   |
| 1P                   | pLY171         | PnrsB                  | 2MS                  |                          |                                                                                                                         |
| 2MP                  | pLY99          | ColE1-Kan <sup>R</sup> | 1MS                  |                          |                                                                                                                         |
| 1MP                  | pLY67          | TermB15                | 1S                   | pLY454                   | pLY454 is the plasmid carrying the downstream genetic parts for the construction of suicide vector targeting phaAB site |
| 1P                   | pLY98          | Sp <sup>R</sup>        | 2S                   |                          |                                                                                                                         |
| 2P                   | pLY443         | phaAB_DHR              | 2MS                  |                          |                                                                                                                         |
| 2MP                  | pLY99          | ColE1-Kan <sup>R</sup> | 1MS                  |                          |                                                                                                                         |

**Table S11. Linkers and genetic parts used to construct the suicide vector backbone pLY475 carrying a *gfp* dropout gene**

| Prefix Linker | Plasmid No. | Genetic part                               | Selectable Marker                  | Suffix Linker | Plasmid generated | Relevant Information                                                                                                                                                                                                                                                                  |
|---------------|-------------|--------------------------------------------|------------------------------------|---------------|-------------------|---------------------------------------------------------------------------------------------------------------------------------------------------------------------------------------------------------------------------------------------------------------------------------------|
| 1P            | pLY453      | phaAB_UHR,<br>PnrsB                        | Amp <sup>R</sup>                   | 2MS           | pLY475            | pLY475 is a suicide vector targeting <i>phaAB</i> site containing phaAB upstream homology region, <i>gfp</i> dropout gene, a terminator, a spectinomycin selection marker cassette, a phaAB downstream homology region, and an <i>E. coli</i> ori with an ampicillin selection marker |
| 2MP           | pLY24       | GFP                                        | GFP,<br>Amp <sup>R</sup>           | 1MS           |                   |                                                                                                                                                                                                                                                                                       |
| 1MP           | pLY454      | termB15,<br>Sp <sup>R</sup> ,<br>phaAB_DHR | Sp <sup>R</sup> , Kan <sup>R</sup> | 2S            |                   |                                                                                                                                                                                                                                                                                       |
| 2P            | pLY23       | ColE1, Amp <sup>R</sup>                    | Amp <sup>R</sup>                   | 1S            |                   |                                                                                                                                                                                                                                                                                       |

**Table S12. Linkers and genetic parts used to construct the suicide vector carrying *sfp* and *car* genes targeting *phaAB* site**

| Prefix Linker | Plasmid | Selectable Marker                        | Suffix Linker | Plasmid generated | Relevant Information                                                                             |
|---------------|---------|------------------------------------------|---------------|-------------------|--------------------------------------------------------------------------------------------------|
| LRBS1-4P      | pIY485  | Amp <sup>R</sup>                         | 1S            | pIY706            | pIY706 is a suicide vector carrying <i>sfp</i> and <i>car</i> genes targeting <i>phaAB</i> site. |
| 1P            | pIY475  | GFP, Kan <sup>R</sup> , Amp <sup>R</sup> | LRBS1-4S      |                   |                                                                                                  |

## References

1. J. Elhai, A. Vepritskiy, A. M. Muro-Pastor, E. Flores, C. P. Wolk, Reduction of conjugal transfer efficiency by three restriction activities of *Anabaena* sp. strain PCC 7120. *J. Bacteriol.* **179**, 1998–2005 (1997).
